# Supplementary material for: Statistical Assessment of Crosstalk Enrichment between Gene Groups in Biological Networks
Source: PubMed Central journal article supplement (PMC3553069; doi:10.1371/journal.pone.0054945), 2013-01-23
Supplement: pone.0054945.s001.pdf [file pone.0054945.s001.pdf]

**Table S1:** Significant KEGG pathway associations to a 389 gene signature up-regulated in bladder cancer.

| <b>KEGG</b>                                  | <b>FDR-CrossTalkZ</b> | <b>FDR-GEA</b> |
|----------------------------------------------|-----------------------|----------------|
| B cell receptor signaling pathway            | 0.00E+00              | 2.53E-04       |
| Cell adhesion molecules (CAMs)               | 0.00E+00              | 2.93E-10       |
| Chemokine signaling pathway                  | 0.00E+00              | 5.75E-06       |
| ECM-receptor interaction                     | 0.00E+00              | 1.57E-07       |
| Fc epsilon RI signaling pathway              | 0.00E+00              | 1.27E-01       |
| Fc gamma R-mediated phagocytosis             | 0.00E+00              | 1.08E-02       |
| Focal adhesion                               | 0.00E+00              | 5.11E-12       |
| Jak-STAT signaling pathway                   | 0.00E+00              | 9.83E-04       |
| Leukocyte transendothelial migration         | 0.00E+00              | 3.70E-10       |
| MAPK signaling pathway                       | 0.00E+00              | 1.55E-03       |
| Natural killer cell mediated cytotoxicity    | 0.00E+00              | 4.02E-04       |
| Pathways in cancer                           | 0.00E+00              | 1.66E-03       |
| Regulation of actin cytoskeleton             | 0.00E+00              | 4.42E-05       |
| T cell receptor signaling pathway            | 0.00E+00              | 8.72E-06       |
| Bacterial invasion of epithelial cells       | 1.41E-45              | 2.64E-01       |
| ErbB signaling pathway                       | 1.41E-45              | 4.68E-01       |
| VEGF signaling pathway                       | 4.37E-43              | 1.10E-01       |
| Neurotrophin signaling pathway               | 8.41E-42              | 5.05E-03       |
| Leishmaniasis                                | 1.85E-40              | 4.37E-01       |
| GnRH signaling pathway                       | 4.65E-40              | 2.00E-01       |
| Adherens junction                            | 1.12E-38              | 1.55E-01       |
| Cytokine-cytokine receptor interaction       | 7.40E-38              | 1.03E-04       |
| Hematopoietic cell lineage                   | 4.29E-37              | 1.55E-01       |
| Glioma                                       | 4.59E-37              | 1.10E-01       |
| Gap junction                                 | 2.51E-35              | 1.80E-01       |
| Axon guidance                                | 4.00E-35              | 4.59E-04       |
| Prostate cancer                              | 9.70E-35              | 6.62E-02       |
| Acute myeloid leukemia                       | 9.72E-34              | 2.93E-01       |
| Viral myocarditis                            | 1.05E-32              | 1.24E-03       |
| Toll-like receptor signaling pathway         | 1.41E-32              | 4.57E-01       |
| Pancreatic cancer                            | 2.06E-31              | 1.60E-01       |
| Renal cell carcinoma                         | 4.11E-30              | 7.25E-01       |
| Non-small cell lung cancer                   | 5.96E-29              | 9.96E-01       |
| Colorectal cancer                            | 1.66E-27              | 3.24E-03       |
| Intestinal immune network for IgA production | 6.78E-27              | 4.80E-02       |
| Small cell lung cancer                       | 1.16E-25              | 4.14E-03       |
| Dorso-ventral axis formation                 | 2.79E-25              | 9.96E-01       |
| Insulin signaling pathway                    | 4.52E-24              | 8.36E-02       |
| Chronic myeloid leukemia                     | 6.97E-24              | 4.00E-01       |
| Tight junction                               | 3.34E-23              | 5.94E-01       |
| Long-term potentiation                       | 3.75E-23              | 9.96E-01       |

|                                                            |          |          |
|------------------------------------------------------------|----------|----------|
| Chagas disease (American trypanosomiasis)                  | 7.59E-22 | 4.29E-01 |
| Vascular smooth muscle contraction                         | 1.42E-21 | 4.07E-02 |
| Endometrial cancer                                         | 4.16E-21 | 5.84E-01 |
| Epithelial cell signaling in Helicobacter pylori infection | 6.56E-20 | 3.21E-01 |
| Pathogenic Escherichia coli infection                      | 3.90E-18 | 9.29E-01 |
| Melanoma                                                   | 5.30E-17 | 3.41E-01 |
| Adipocytokine signaling pathway                            | 6.30E-16 | 1.37E-01 |
| Apoptosis                                                  | 4.50E-15 | 6.37E-02 |
| Calcium signaling pathway                                  | 6.62E-15 | 6.57E-02 |
| Antigen processing and presentation                        | 2.95E-14 | 1.15E-04 |
| Complement and coagulation cascades                        | 2.95E-11 | 1.07E-03 |
| Cytosolic DNA-sensing pathway                              | 6.11E-11 | 7.52E-01 |
| Hypertrophic cardiomyopathy (HCM)                          | 1.92E-10 | 3.15E-01 |
| Type II diabetes mellitus                                  | 1.95E-10 | 2.11E-01 |
| RIG-I-like receptor signaling pathway                      | 1.99E-10 | 3.95E-01 |
| TGF-beta signaling pathway                                 | 2.38E-10 | 1.80E-01 |
| Bladder cancer                                             | 3.37E-10 | 9.96E-01 |
| Phosphatidylinositol signaling system                      | 1.54E-09 | 5.93E-01 |
| Melanogenesis                                              | 2.02E-09 | 7.53E-01 |
| Progesterone-mediated oocyte maturation                    | 2.58E-09 | 8.07E-01 |
| Type I diabetes mellitus                                   | 1.56E-08 | 1.24E-03 |
| Vibrio cholerae infection                                  | 1.76E-08 | 9.96E-01 |
| Asthma                                                     | 4.50E-08 | 3.19E-03 |
| Prion diseases                                             | 1.30E-07 | 2.41E-02 |
| NOD-like receptor signaling pathway                        | 1.46E-07 | 1.35E-01 |
| Long-term depression                                       | 2.37E-07 | 9.96E-01 |
| mTOR signaling pathway                                     | 3.31E-07 | 9.96E-01 |
| Wnt signaling pathway                                      | 2.35E-06 | 1.83E-01 |
| Aldosterone-regulated sodium reabsorption                  | 2.75E-06 | 3.75E-01 |
| Graft-versus-host disease                                  | 3.72E-06 | 6.57E-01 |
| Vasopressin-regulated water reabsorption                   | 1.95E-05 | 9.96E-01 |
| Endocytosis                                                | 4.83E-05 | 2.71E-02 |
| Oocyte meiosis                                             | 3.64E-04 | 7.25E-01 |
| Dilated cardiomyopathy                                     | 6.46E-04 | 4.76E-01 |
| Inositol phosphate metabolism                              | 2.74E-03 | 9.96E-01 |
| Thyroid cancer                                             | 3.59E-03 | 9.78E-01 |
| Taste transduction                                         | 5.15E-03 | 9.96E-01 |
| Neuroactive ligand-receptor interaction                    | 1.40E-02 | 8.23E-01 |
| Amyotrophic lateral sclerosis (ALS)                        | 1.41E-02 | 9.96E-01 |
| Olfactory transduction                                     | 1.44E-02 | 9.96E-01 |
| Alzheimer's disease                                        | 1.49E-02 | 5.84E-01 |
